# Supplementary material for: A triphenylamine-based Pt(ii) metallacage via coordination-driven self-assembly for nonlinear optical power limiting
Source: Royal Society of Chemistry journal article supplement (doi:10.1039/d2tc01256a), 2022-01-01
Supplement: d2tc01256a1.pdf [file d2tc01256a1.pdf]

# Triphenylamine-Based Pt(II) Metallacage via Coordination-Driven Self-Assembly for Nonlinear Optical Power Limiting

Zihao Yin, Xingmao Chang, Jianyang Zang, Simin Lin, Zhijie Zhou, Taihong Liu, Liping Ding, Haonan Peng,\* and Yu Fang

Key Laboratory of Applied Surface and Colloid Chemistry (Ministry of Education), School of Chemistry and Chemical Engineering, Shaanxi Normal University, Xi'an 710062, P. R. China

\*Corresponding authors: phn@snnu.edu.cn

## Contents

|                                                                                          |            |
|------------------------------------------------------------------------------------------|------------|
| 1. Synthesis details of the compounds .....                                              | S2         |
| 1.1 Synthesis of <i>cis</i> -(PEt <sub>3</sub> ) <sub>2</sub> Pt(OTf) <sub>2</sub> ..... | S2         |
| 1.2 Synthesis of the ligand .....                                                        | S2         |
| 1.3 Synthesis of the metallacage .....                                                   | S2         |
| 2. Details for the Two-Photon Absorption (2PA) and OPL Measurements.....                 | S4         |
| 3. Linear photophysical properties .....                                                 | S6         |
| 4. Crystallographic characterization .....                                               | S10        |
| 5. Theoretical calculation data .....                                                    | S14        |
| 6. Nonlinear photophysical properties .....                                              | S16        |
| 7. NMR and MS characterization data .....                                                | S19        |
| <b>References</b> .....                                                                  | <b>S24</b> |

## 1. Synthesis details of the compounds

### 1.1 Synthesis of *cis*-(PEt<sub>3</sub>)<sub>2</sub>Pt(OTf)<sub>2</sub>

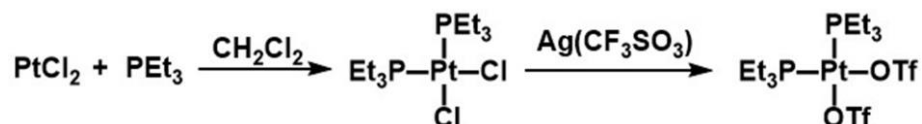

To a 200 mL Schlenk bottle wrapped with aluminum foil were added PtCl<sub>2</sub> (3.3 g, 12.4 mmol), and then added 80 mL anhydrous dichloromethane to dissolve it. Following 25 mL PEt<sub>3</sub> (25.0 g, 20 wt% in ethanol solution, 42.3 mmol) was added. The mixture was stirred in dark at room temperature for 6 days. Then the solvent was evaporated and the residue is recrystallized by CH<sub>2</sub>Cl<sub>2</sub>/CH<sub>3</sub>OH to get white solid, the solid was washed by CH<sub>3</sub>OH to get the PtCl<sub>2</sub>(PEt<sub>3</sub>)<sub>2</sub>. Yield: 45%. <sup>1</sup>H NMR (600 MHz, CD<sub>2</sub>Cl<sub>2</sub>, 298 K) δ (ppm): 2.09-1.97 (m, 12H), 1.22-1.07 (m, 18H). <sup>31</sup>P{<sup>1</sup>H} NMR (243 MHz, CD<sub>2</sub>Cl<sub>2</sub>, 298 K) δ (ppm): 9.00 (<sup>195</sup>Pt satellites, <sup>1</sup>J<sub>Pt-P</sub> = 3509.2 Hz).

PtCl<sub>2</sub>(PEt<sub>3</sub>)<sub>2</sub> (500.0 mg, 1.0 mmol) and Ag(CF<sub>3</sub>SO<sub>3</sub>) (524.3 mg, 2.04 mmol) were dissolved in 10 mL CH<sub>2</sub>Cl<sub>2</sub>, and the mixture was stirred in dark at room temperature for 8 h. Afterwards the solution was filtered, and the solvent was removed by nitrogen flow. The solid was dissolved in 1 mL CH<sub>2</sub>Cl<sub>2</sub> and then added 9 mL ethyl ether to get precipitate, the final product was collected by centrifugation to give *cis*-(PEt<sub>3</sub>)<sub>2</sub>Pt(OTf)<sub>2</sub> as a gray-white solid. Yield: 95 %. <sup>1</sup>H NMR (600 MHz, CD<sub>2</sub>Cl<sub>2</sub>, 298 K) δ (ppm): 2.05-1.84 (m, 12H), 1.34-1.16 (m, 18H). <sup>31</sup>P{<sup>1</sup>H} NMR (243 MHz, CD<sub>2</sub>Cl<sub>2</sub>, 298 K) δ (ppm): 8.93 (<sup>195</sup>Pt satellites, <sup>1</sup>J<sub>Pt-P</sub> = 3772.6 Hz).

### 1.2 Synthesis of the ligand

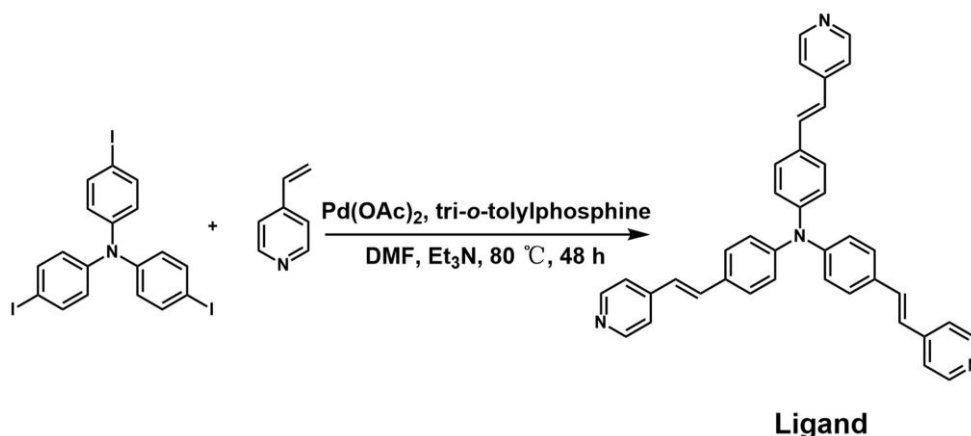

Yield: 55 %.  $^1\text{H}$  NMR (600 MHz,  $\text{CD}_2\text{Cl}_2$ , 298 K)  $\delta$  (ppm): 8.53 (d,  $J = 6.0$  Hz, 6H), 7.50 (d,  $J = 8.6$  Hz, 6H), 7.37 (d,  $J = 6.0$  Hz, 6H), 7.32 (d,  $J = 16.3$  Hz, 3H), 7.14 (d,  $J = 8.6$  Hz, 6H), 6.98 (d,  $J = 16.3$  Hz, 3H).  $^{13}\text{C}$  NMR (151 MHz,  $\text{CD}_2\text{Cl}_2$ , 298 K)  $\delta$  (ppm): 150.01 (s), 147.34 (s), 144.77 (s), 132.29 (s), 131.41 (s), 128.12 (s), 124.71 (s), 124.36 (s), 120.60 (s).

### 1.3 Synthesis of the metallacage

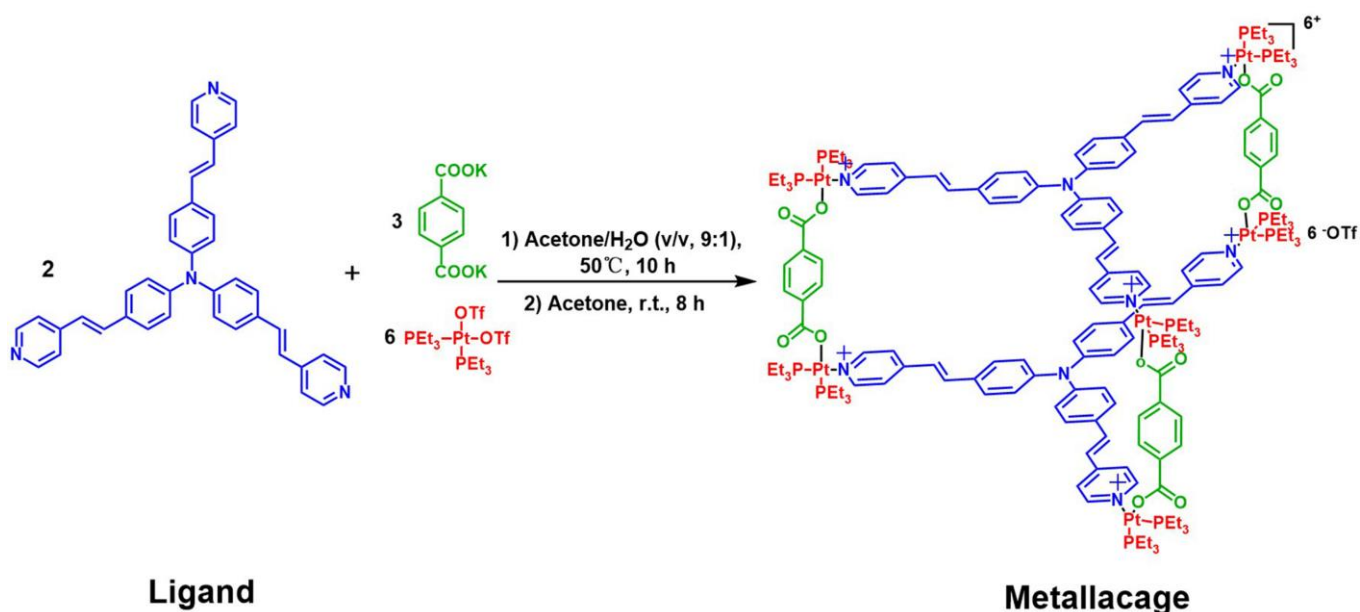

Yield: 92 %.  $^1\text{H}$  NMR (600 MHz,  $\text{CD}_2\text{Cl}_2$ , 298 K)  $\delta$  (ppm): 8.57 (d,  $J = 3.5$  Hz, 12H), 7.72 (s, 12H), 7.55 (d,  $J = 6.1$  Hz, 12H), 7.47 (d,  $J = 8.7$  Hz, 12H), 7.41 (d,  $J = 16.2$  Hz, 6H), 7.03 (d,  $J = 8.6$  Hz, 12H), 6.91 (d,  $J = 16.3$  Hz, 6H).  $^{31}\text{P}\{^1\text{H}\}$  NMR (243 MHz,  $\text{CD}_2\text{Cl}_2$ , 298 K)  $\delta$  (ppm): 4.72 (d,  $^2J_{\text{P-P}} = 21.6$  Hz,  $^{195}\text{Pt}$  satellites,  $^1J_{\text{Pt-P}} = 3152.0$  Hz), and -0.60 (d,  $^2J_{\text{P-P}} = 21.4$  Hz,  $^{195}\text{Pt}$  satellites,  $^1J_{\text{Pt-P}} = 3556.5$  Hz). ESI-TOF-MS:  $m/z$  1545.41 ( $[\text{M}-3\text{OTf}]^{3+}$ ) and 1122.07 ( $[\text{M}-4\text{OTf}]^{4+}$ ).

## 2. Details for the Two-Photon Absorption (2PA) and OPL Measurements

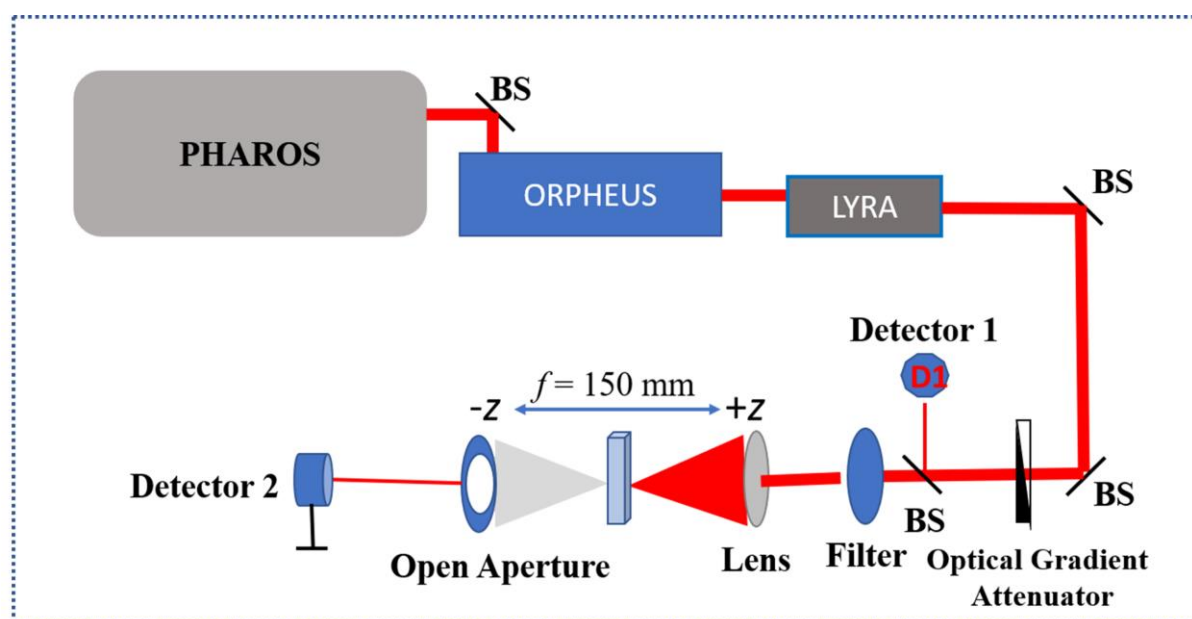

**Scheme S1.** Schematic diagram of femtosecond open-aperture Z-scan set-up in 2PA measurements.

The single wavelength Z-scan technique is widely used to determine 2PA cross-section ( $\delta_{2PA}$ ) due to its simplicity and accuracy. The experimental setup for femtosecond Z-scan absorption measurements has been widely described elsewhere and shown in Scheme S1.<sup>1,2</sup> In this work,  $\delta_{2PA}$  values were obtained for the specific wavelength delivered by the source with femtosecond pulses of kHz repetition rate. Measurements of the  $\delta_{2PA}$  values were performed by the open aperture Z-scan technique focused on the 630-1000 nm spectral region. In detail, the laser source was a mode-locked Yb:KGW laser (Light Conversion, Pharos) with a pulse width of 200 fs and a repetition rate of 10 kHz. An output of 1028 nm was converted using an optical parametric amplifier (Light Conversion, Orpheus) as well as a second harmonic generator (Light Conversion, Lyra), which could be manually tuned to produce radiation ranging from 315 nm to 2600 nm. Using a lens system, the collection was focused on a PM320E photodiode (Thorlabs) with 150 mm long travel stages (Thorlabs). The pulses were focused onto a cuvette filled with the sample, where it produced GW-level intensity at the focal point of the lens and the laser input was high enough for the purpose of 2PA measurements. The sample concentrations were  $1.0 \times 10^{-2}$  M and  $2.0 \times 10^{-3}$  M. Sample cuvette with 1.0 mm length satisfied the condition that the cell-length was less than the Rayleigh range. Neutral density filters were utilized for attenuating the input pulse energy. Using the open aperture Z-scan configuration, the nonlinear absorption coefficient ( $\beta$ ) of the sample was measured. Each measurement was repeated

multiple times and averaged to retrieve the NLO coefficients.<sup>3,4</sup> The OPL measurements were performed on the same femtosecond laser system using 1 mm path length quartz cuvettes with dye concentrations  $\sim 1.0 \times 10^{-2}$  M. To scan the sample in closed aperture configuration simultaneously, a variable aperture was placed in front of the photodetector in an additional path. The closed aperture Z-scan data provided the sign and magnitude of the nonlinear refractive index ( $n_2$  or  $r$ ).<sup>1,5,6</sup>

PHAROS laser system employs a chirped pulse amplification technique, which is based on stretching the seed pulses, amplification and compression to achieve the highest pulse peak power with an ultrashort pulse duration. In which the oscillator is made from a single monolithic aluminum block that ensures stable operation. The oscillator comprises chirped mirrors for group velocity dispersion compensation. Yb:KGW is used as a gain medium, directly pumped by laser diode modules. The repetition rate of the oscillator pulses is typically 76 MHz with an average power ranging from 0.6 to 2 W. Spectral bandwidth is within 10-25 nm (FWHM) and yields a corresponding pulse duration of  $\sim 70$ -90 fs. The resulting pulse width can be tuned by changing the compressor length. Tuning the pulse duration is accomplished by inducing positive or negative chirp from a model-specific shortest value to a maximum of approximately 10 ps.

### 3. Linear photophysical properties

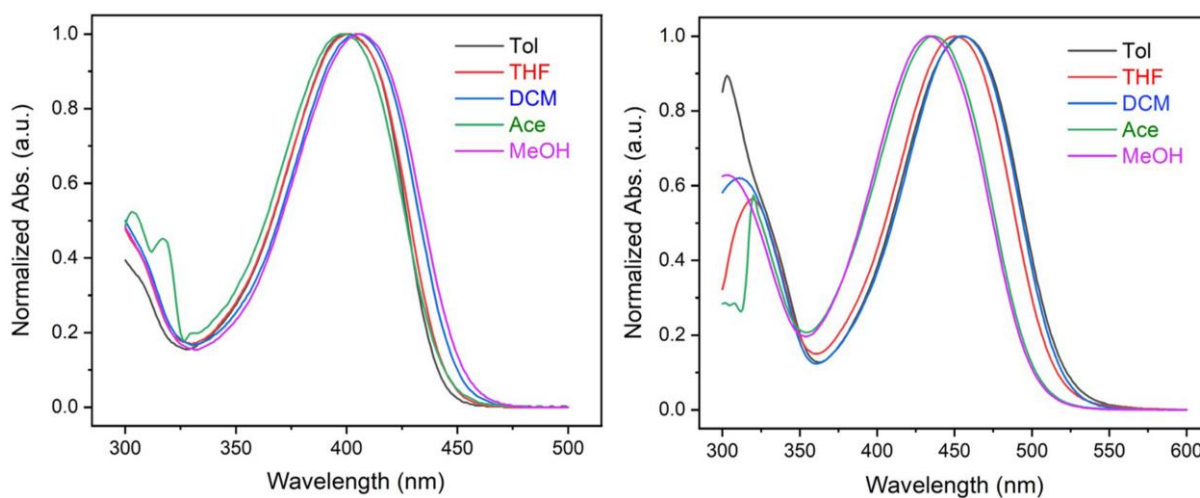

**Figure S1.** UV-vis absorption spectra of the ligand (left) and the metallacage (right) in different solvents ( $c = 1 \times 10^{-5}$  M,  $\lambda_{\text{ex}} = 400/430$  nm). Tol: toluene; THF: tetrahydrofuran; DCM: dichloromethane; Ace: acetone; MeOH: methanol.

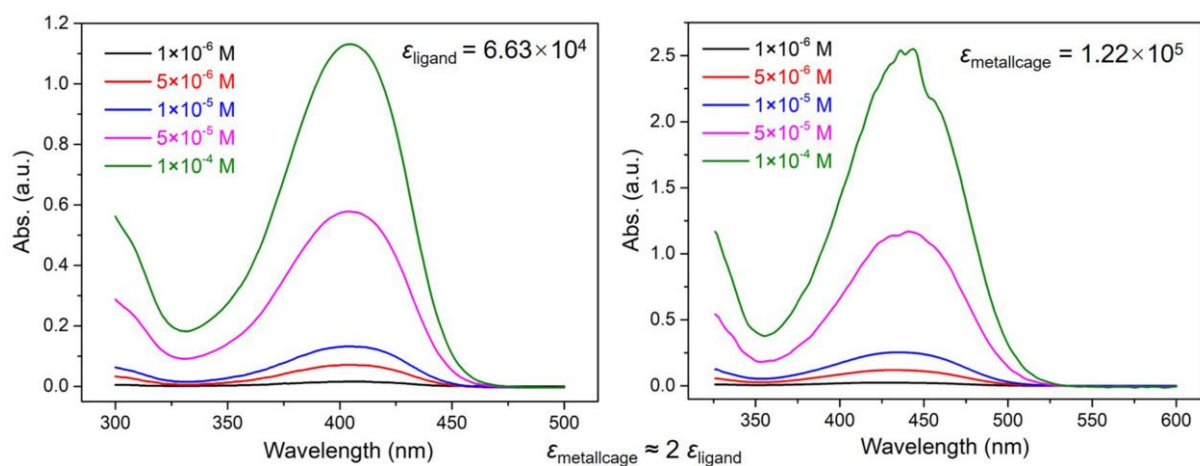

**Figure S2.** UV-vis absorption spectra of the ligand (left) and the metallacage (right) at different concentrations in DMF.  $\epsilon$  is the molar extinction coefficients of the compound.

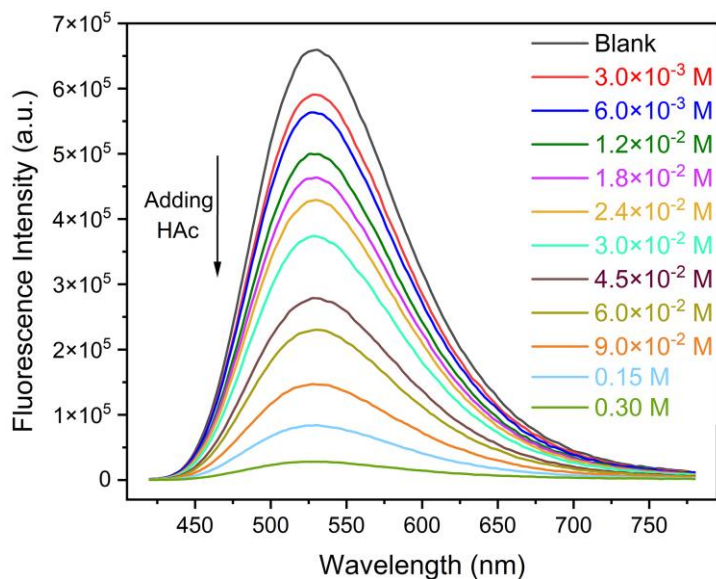

**Figure S3.** Spectral changes of the fluorescence emission of the  $1 \times 10^{-5}$  ligand in acetone with gradual adding HAc.

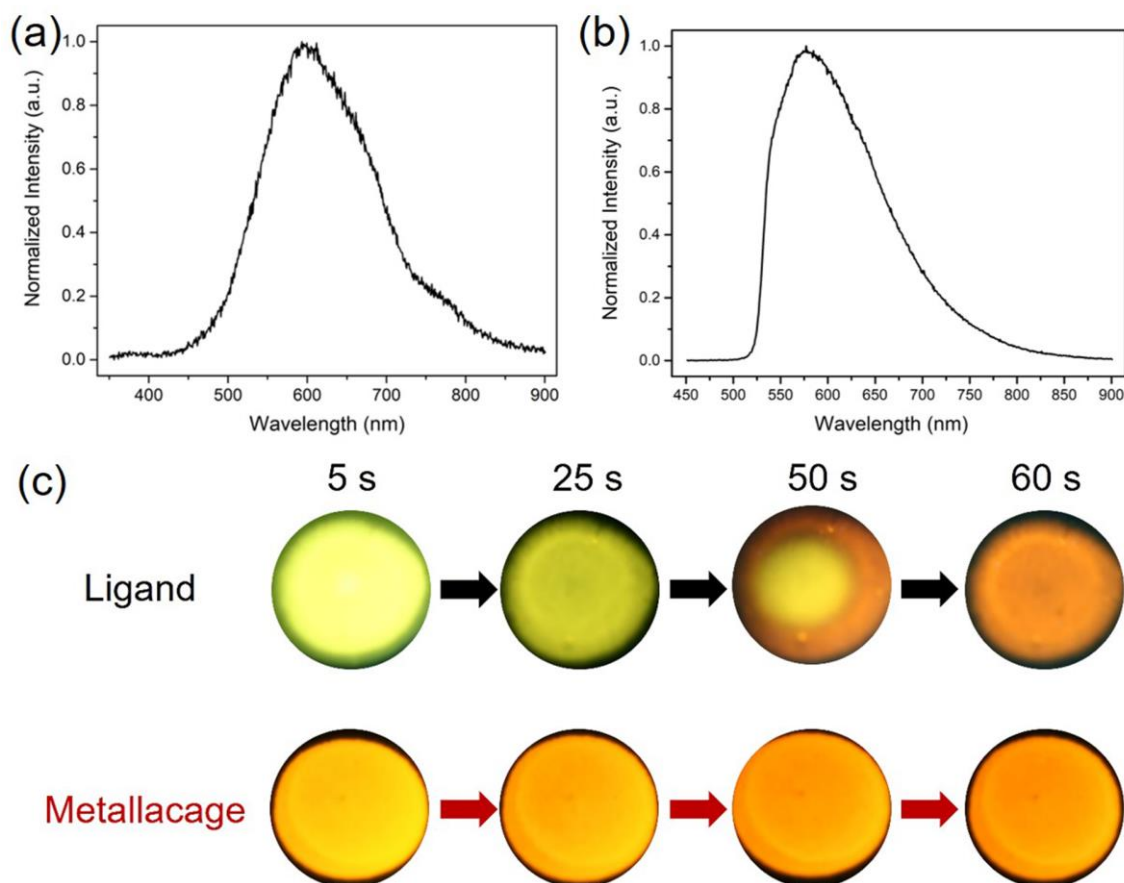

**Figure S4.** Fluorescence emission spectra of the ligand (a) and the metallacage (b) in film state with a silica gel plate as the substrate, the excitation wavelength is 400 nm. (c) The photographs of the fluorescence change of the ligand and the metallacage in film state when exposed in air for 1 min. The photos were taken under UV light (365 nm) illumination. The fluorescence of the ligand changes significantly within one minute is due to that the ligand gradually aggregates with the evaporation of the solvent.

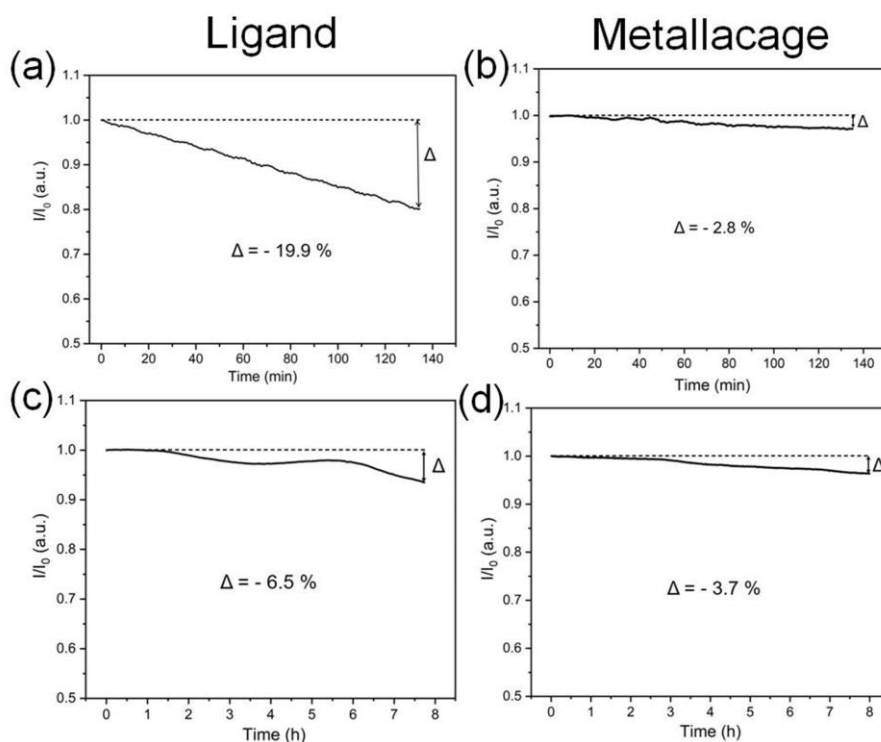

**Figure S5.** Fluorescence intensity changes of the ligand and the metallacage at the maximum emission wavelength in (a, b) DCM solution and (c, d) film state under 400/430 nm continuous illumination.

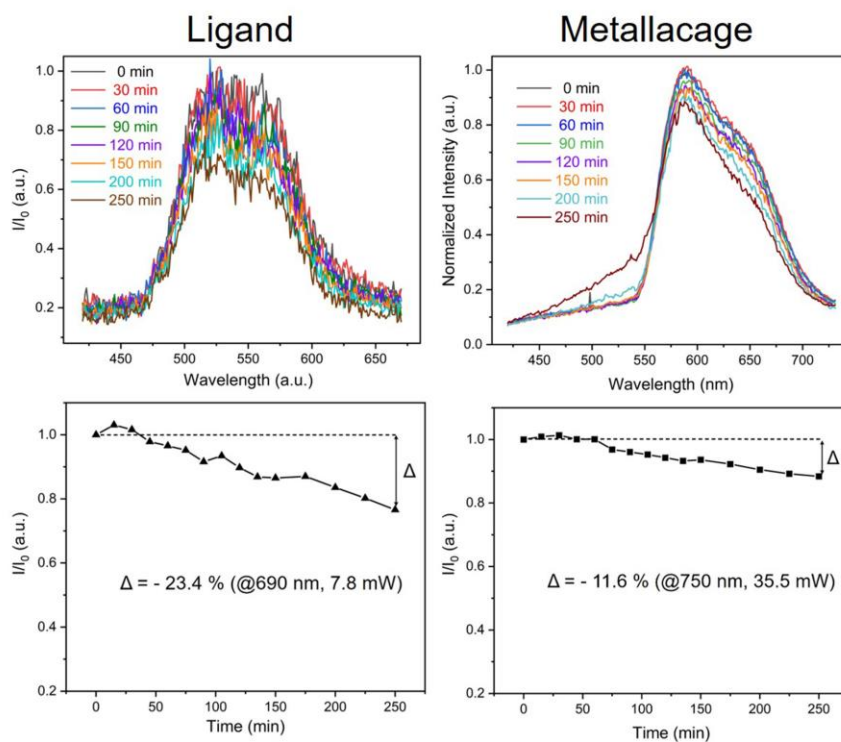

**Figure S6.** Fluorescence spectra and intensity changes of the ligand and the metallacage at the maximum emission wavelength in DMF solution ( $1 \times 10^{-2}$  M) under 7.8 mW 690 nm laser (for the ligand)/35.5 mW 750 nm laser (for the metallacage).



**Table S1.** Main linear photophysical parameters of the ligand and the metallacage

| Comp.       | $\lambda_{\text{abs}}/\text{nm}$ | $\varepsilon/\text{M}^{-1} \cdot \text{cm}^{-1}$ | $\lambda_{\text{em}}/\text{nm}$ | $\Delta\lambda/\text{nm}$ | $\Phi_{\text{F}} \%$ | $\Phi_{\text{F}} \%$ | $\tau_{\text{F}}/\text{ns}$ |
|-------------|----------------------------------|--------------------------------------------------|---------------------------------|---------------------------|----------------------|----------------------|-----------------------------|
|             |                                  |                                                  |                                 |                           | (silica)             | (glass)              |                             |
| Ligand      | 399                              | $6.63 \times 10^4$                               | 528                             | 131                       | 1.6                  | 4.4                  | 2.80                        |
| Metallacage | 437                              | $1.22 \times 10^5$                               | 599                             | 162                       | 7.1                  | 7.6                  | 0.93/2.68                   |

**Table S2.** Main linear photophysical parameters of the ligand and the metallacage in different solvents ( $c \approx 1 \times 10^{-5} \text{ mol/L}$ ). The  $\Phi_{\text{F}}$  in DMF could not be obtained because the metallacage was not stable in DMF at the same concentration.**The ligand**

| Solvent | $E_{\text{T}}(30)$ | $\lambda_{\text{abs}}/\text{nm}$ | $\lambda_{\text{em}}/\text{nm}$ | $\Phi_{\text{F}} \%$ |
|---------|--------------------|----------------------------------|---------------------------------|----------------------|
| DCM     | 40.7               | 405                              | 506                             | 72.2                 |
| Ace     | 42.2               | 399                              | 522                             | 55.1                 |
| DMF     | 43.2               | 404                              | 534                             | -                    |
| MeCN    | 45.6               | 398                              | 537                             | 38.7                 |
| MeOH    | 55.4               | 406                              | 538                             | 2.2                  |

**The metallacage**

| Solvent | $E_{\text{T}}(30)$ | $\lambda_{\text{abs}}/\text{nm}$ | $\lambda_{\text{em}}/\text{nm}$ | $\Phi_{\text{F}} \%$ |
|---------|--------------------|----------------------------------|---------------------------------|----------------------|
| DCM     | 40.7               | 455                              | 594                             | 45.1                 |
| Ace     | 42.2               | 437                              | 599                             | 19.7                 |
| DMF     | 43.2               | 433                              | 601                             | -                    |
| MeCN    | 45.6               | 431                              | 602                             | 21.1                 |
| MeOH    | 55.4               | 434                              | 590                             | 15.5                 |

## 4. Crystallographic characterization

**Table S3.** Crystallographic data and refinement details of the metallage

|                                               |                                                                                                                                                             |
|-----------------------------------------------|-------------------------------------------------------------------------------------------------------------------------------------------------------------|
| Empirical formula                             | $C_{176}H_{252}F_6N_8O_{18}P_{12}Pt_6S_2$                                                                                                                   |
| CCDC Deposit Number                           | 2110646                                                                                                                                                     |
| Formula weight                                | 4488.14                                                                                                                                                     |
| Temperature                                   | 193.0 K                                                                                                                                                     |
| Crystal system, space group                   | Trigonal, P-3                                                                                                                                               |
| Unit cell dimensions                          | $a = 31.9128(18) \text{ \AA}$ $\alpha = 90^\circ$<br>$b = 31.9128(18) \text{ \AA}$ $\beta = 90^\circ$<br>$c = 17.9523(17) \text{ \AA}$ $\gamma = 120^\circ$ |
| Volume                                        | $15834(2) \text{ \AA}^3$                                                                                                                                    |
| Z                                             | 2                                                                                                                                                           |
| $\rho_{\text{calc}}$                          | $0.941 \text{ g}\cdot\text{cm}^3$                                                                                                                           |
| Absorption coefficient                        | $3.992 \text{ mm}^{-1}$                                                                                                                                     |
| F(000)                                        | 4484.0                                                                                                                                                      |
| Crystal size                                  | $0.12 \times 0.1 \times 0.1 \text{ mm}^3$                                                                                                                   |
| Radiation                                     | GaK $\alpha$ ( $\lambda = 1.34139$ )                                                                                                                        |
| $2\Theta$ range for data collection/ $^\circ$ | 2.782 to 121.828                                                                                                                                            |
| Index ranges                                  | $-28 \leq h \leq 41, -41 \leq k \leq 40, -17 \leq l \leq 23$                                                                                                |
| Reflections collected                         | 84333                                                                                                                                                       |
| Independent reflections                       | 22604 [ $R_{\text{int}} = 0.0604, R_{\text{sigma}} = 0.0576$ ]                                                                                              |
| Data/restraints/parameters                    | 22604/281/695                                                                                                                                               |
| Goodness-of-fit on $F^2$                      | 0.986                                                                                                                                                       |
| Final R indexes [ $I \geq 2\sigma(I)$ ]       | $R_1 = 0.0695, wR_2 = 0.2303$                                                                                                                               |
| Final R indexes [all data]                    | $R_1 = 0.1089, wR_2 = 0.2590$                                                                                                                               |
| Largest diff. peak/hole                       | $1.34/-1.54 \text{ e \AA}^{-3}$                                                                                                                             |

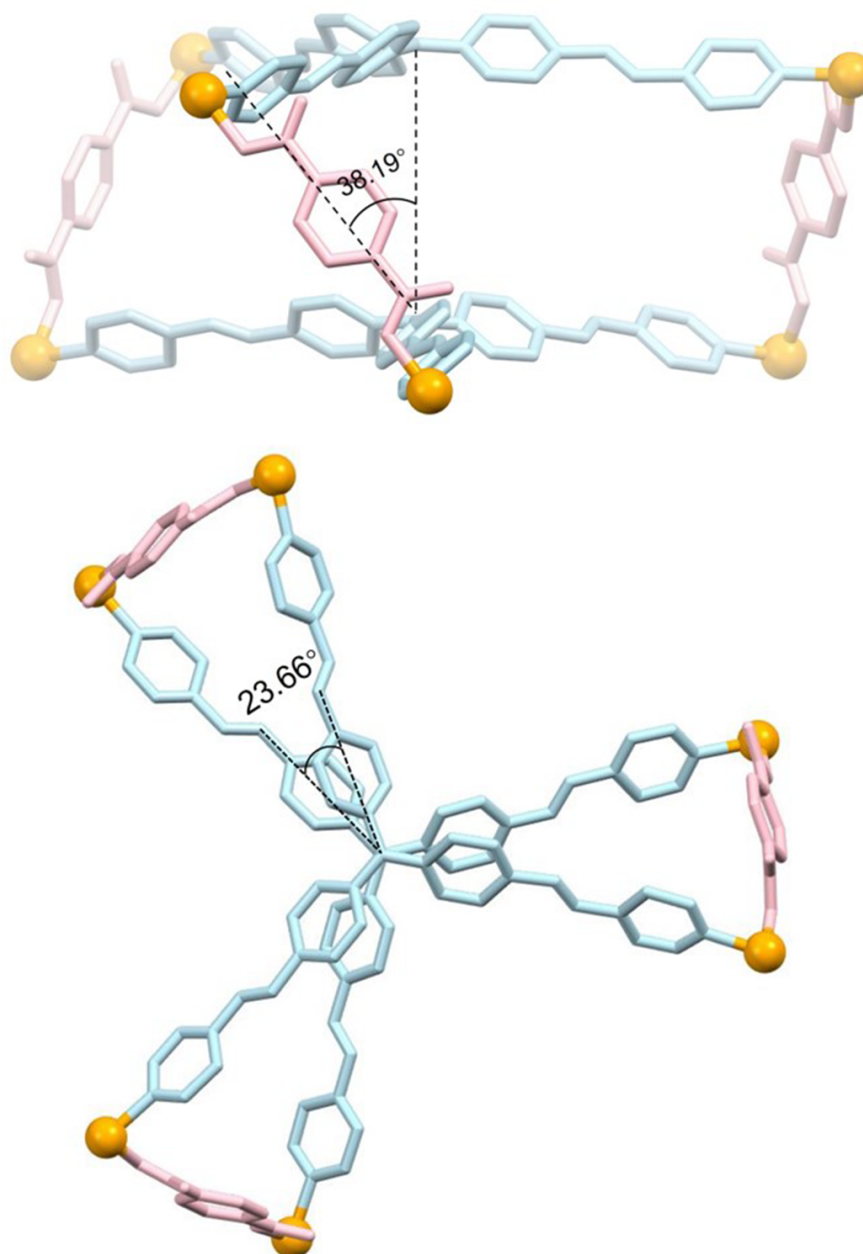

**Figure S7.** Side and top-on views of the solid-state superstructure of the metallacage with the measurement of deviation angle.

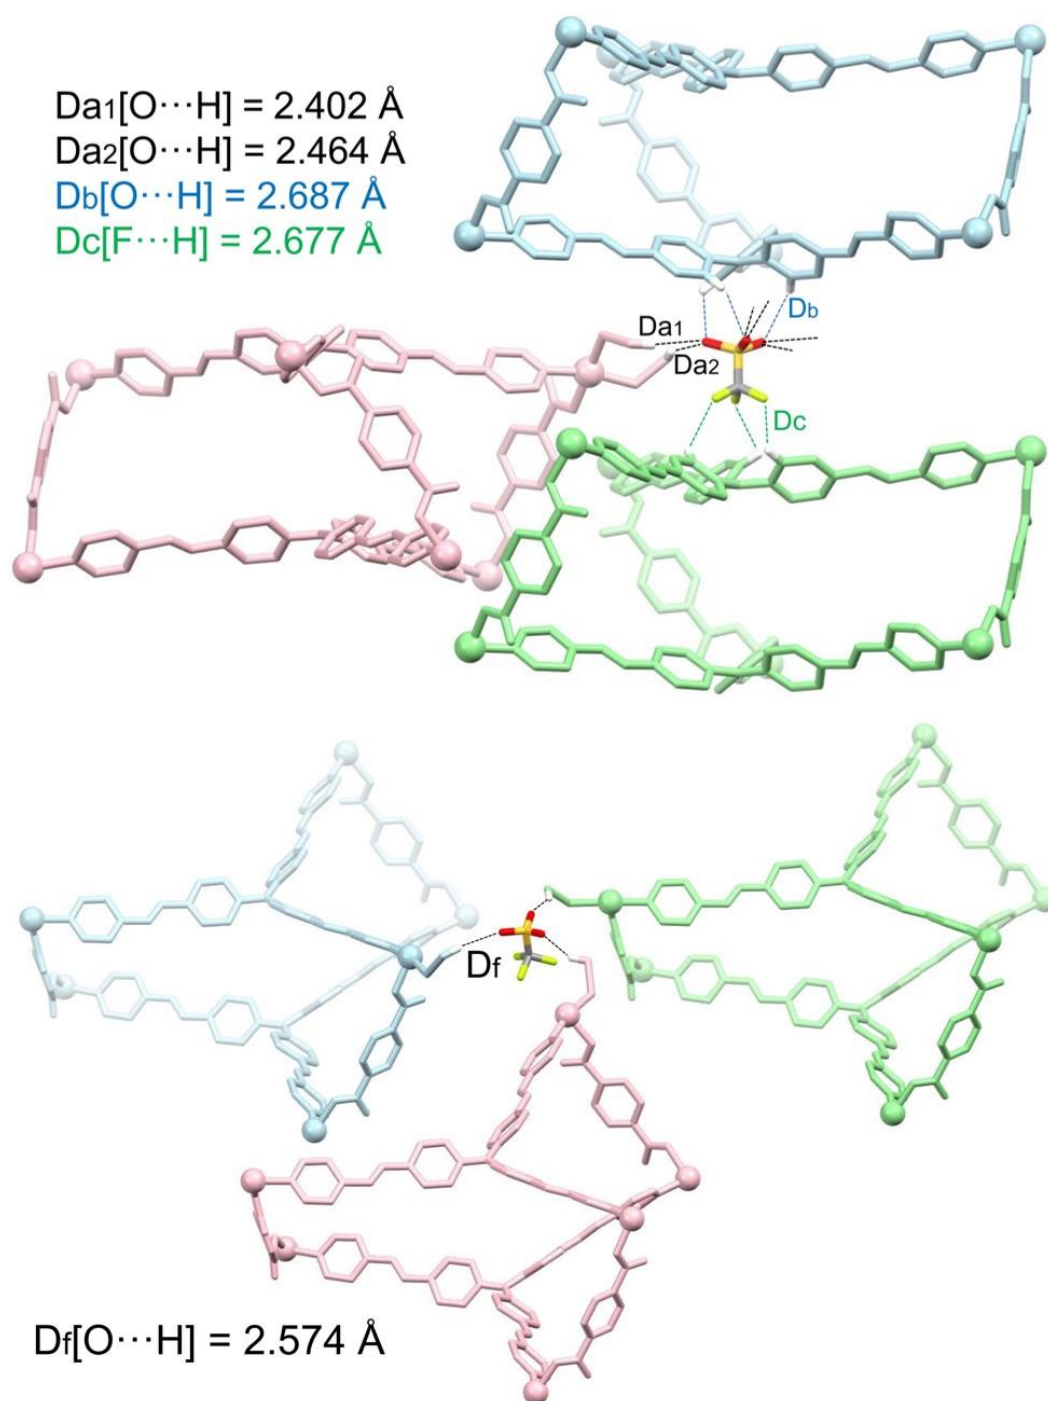

**Figure S8.** Supramolecular interaction distances of  $\text{OTf}^-$  with adjacent metallacages (top for type I and bottom for type II).

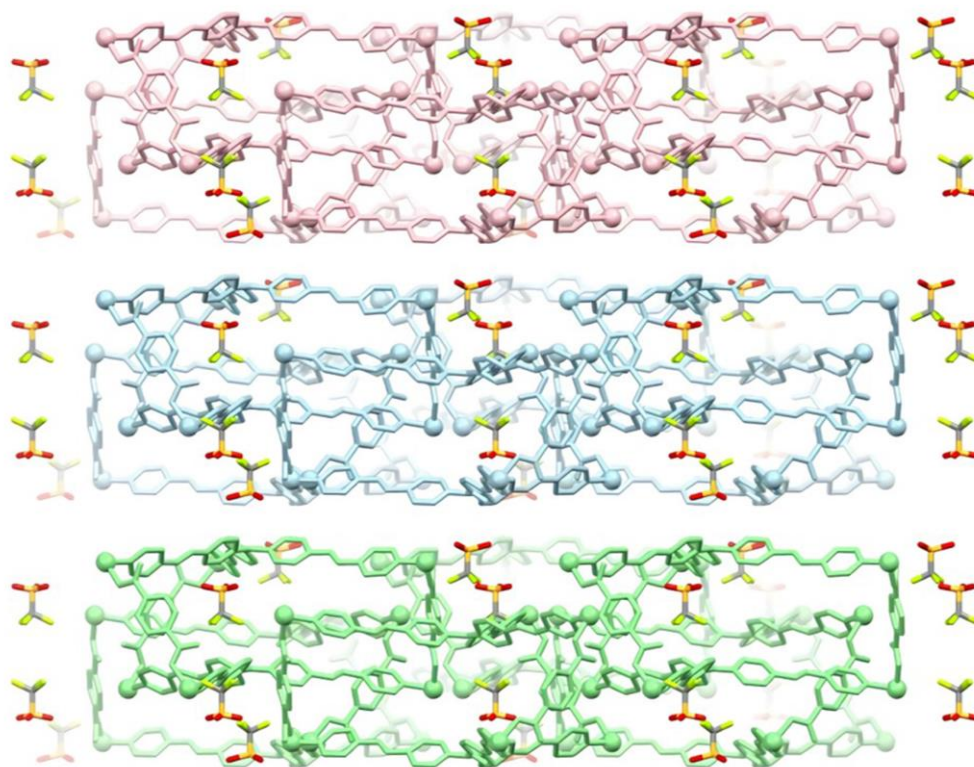

**Figure S9.** Interlayer packing of the supramolecular structure of the metallacage.

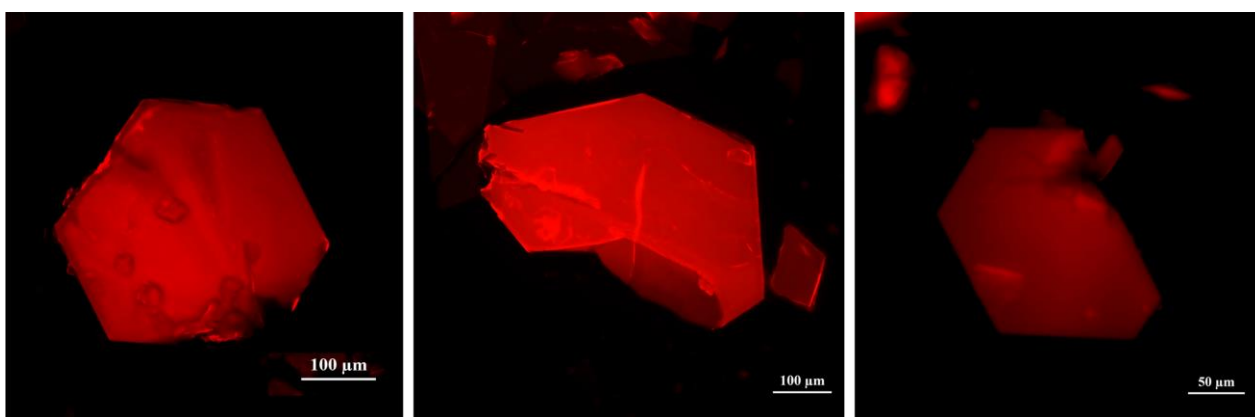

**Figure S10.** Photographs of solid crystals of the metallacage under UV light.

## 5. Theoretical calculation data

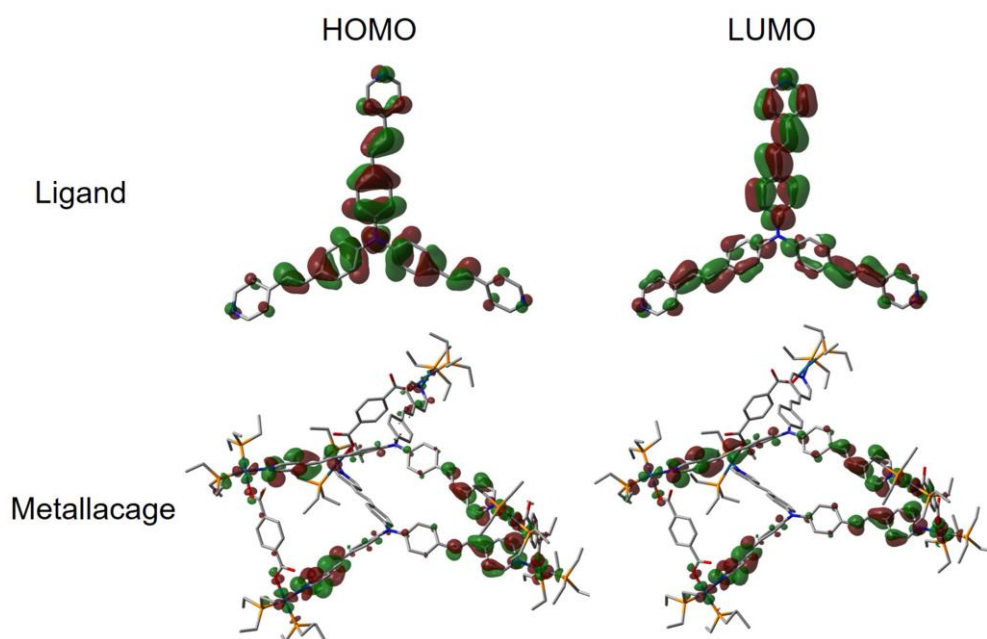

**Figure S11.** Frontier molecular orbitals at the B3LYP/6-31G(d) level, HOMO and LUMO distribution of the ligand and the metallacage.

**Table S4.** Excited states, transitions, energy, excitation wavelength and oscillator strength of the ligand

| Excited State | Symmetry  | Transitions   | Energy (eV) | Excitation Wavelength | Osc. Strength ( <i>f</i> ) |
|---------------|-----------|---------------|-------------|-----------------------|----------------------------|
| 1             | Singlet-A | HOMO→LUMO     | 3.1592      | 392.46                | 1.3892                     |
| 2             | Singlet-A | HOMO→LUMO+5   | 3.4093      | 363.67                | 1.5606                     |
| 3             | Singlet-A | HOMO→LUMO+2   | 4.1581      | 298.17                | 0.0039                     |
| 4             | Singlet-A | HOMO→LUMO+3   | 4.2582      | 291.16                | 0.0285                     |
| 5             | Singlet-A | HOMO→LUMO+2   | 4.4650      | 277.68                | 0.2420                     |
| 6             | Singlet-A | HOMO-3→LUMO+1 | 4.6490      | 266.69                | 0.6114                     |
| 7             | Singlet-A | HOMO-2→LUMO+1 | 4.7014      | 263.72                | 0.1135                     |
| 8             | Singlet-A | HOMO-4→LUMO   | 4.7067      | 263.42                | 0.0026                     |

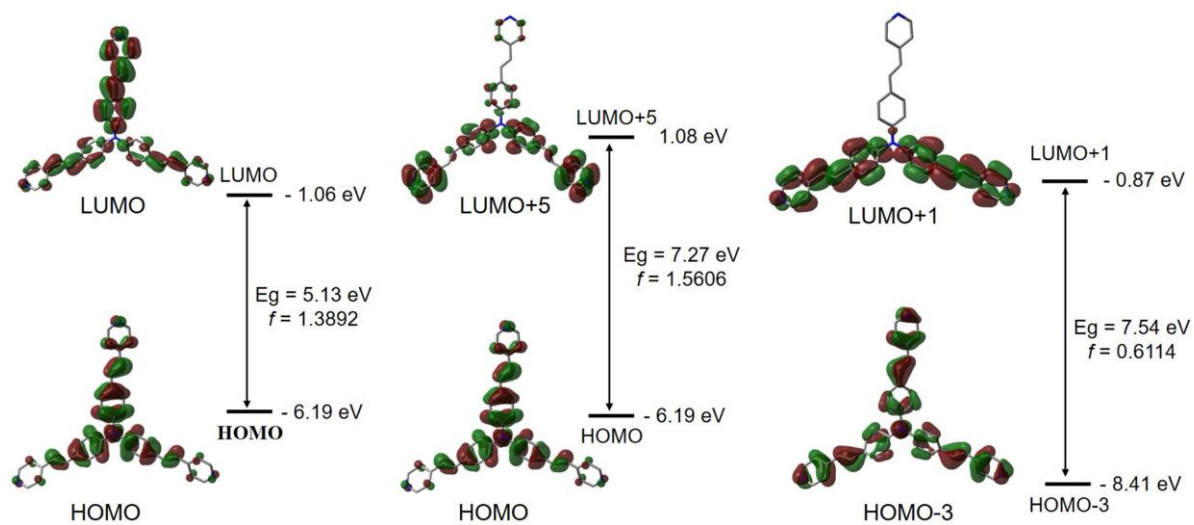

**Figure S12.** Frontier molecular orbitals, energy gap and the oscillator strength  $f$  at the B3LYP/6-31G(d) level of the ligand.

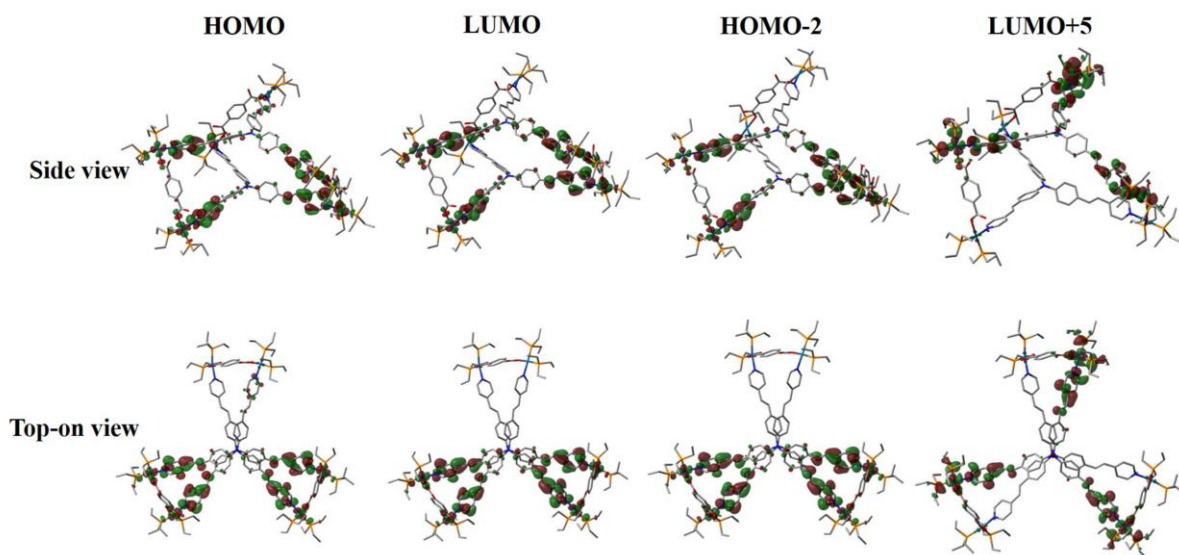

**Figure S13.** Frontier molecular orbitals of the metallacage in excited states. Calculated at the M06-2X/6-31G(d)/LANL2DZ (for Pt) level.



## 6. Nonlinear photophysical properties

**Table S5.** Main nonlinear photophysical parameters of the ligand and the metallage in DMF ( $c = 1.0 \times 10^{-2}$  M)

| Comp.     | $\lambda_{\text{abs}}/\text{nm}$ (1PA) | $\lambda_{\text{abs}}/\text{nm}$ (2PA) | $\beta/\text{cm/GW}$ | $\delta_{2\text{PA}}/\text{GM}$ | $n_2/\text{cm}^2/\text{GW}$ |
|-----------|----------------------------------------|----------------------------------------|----------------------|---------------------------------|-----------------------------|
| Ligand    | 403                                    | 690                                    | 0.18                 | 841                             | $8.0 \times 10^{-6}$        |
| Metallage | 433                                    | 750                                    | 0.44                 | 2010                            | $1.8 \times 10^{-5}$        |

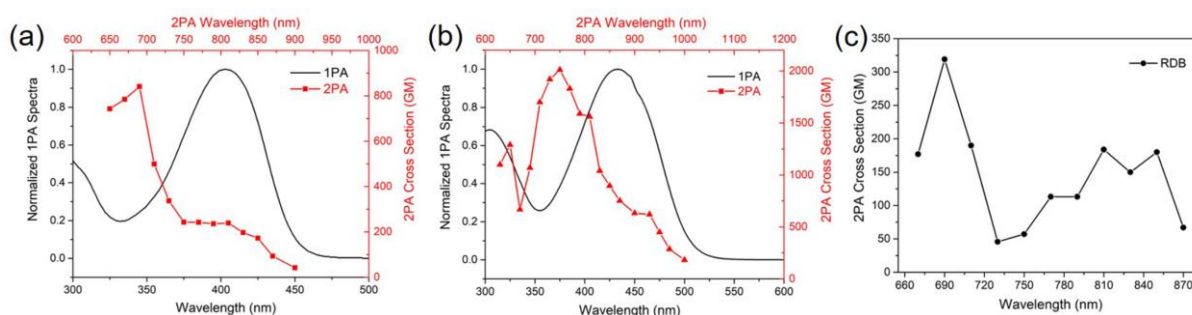

**Figure S14.** Combined 1PA and 2PA spectra of the ligand (a) and the metallage (b) in DMF. (c) Two-photon absorption cross section ( $\delta_{2\text{PA}}$ ) of the reference compound Rhodamine B (RDB) in DMF excited with different femtosecond wavelengths. ( $c = 1 \times 10^{-2}$  M)

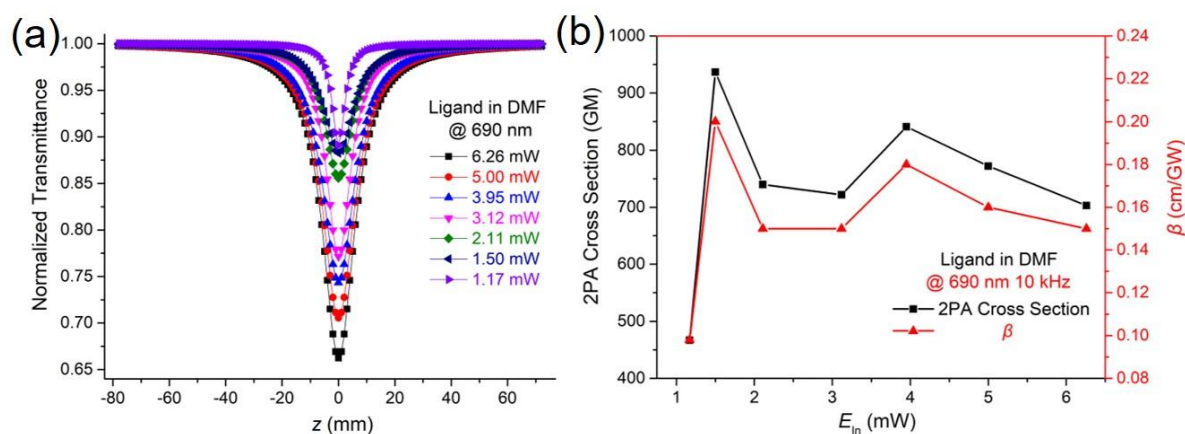

**Figure S15.** (a) Normalized transmittance curves of the ligand in DMF excited at 690 nm on open aperture Z-scan style with increasing the exciting laser power. (b)  $\delta_{2\text{PA}}$  values and the 2PA coefficient  $\beta$  of the ligand in DMF measured at 690 nm as a function of the input laser power at the focal plane. ( $c = 1 \times 10^{-2}$  M)



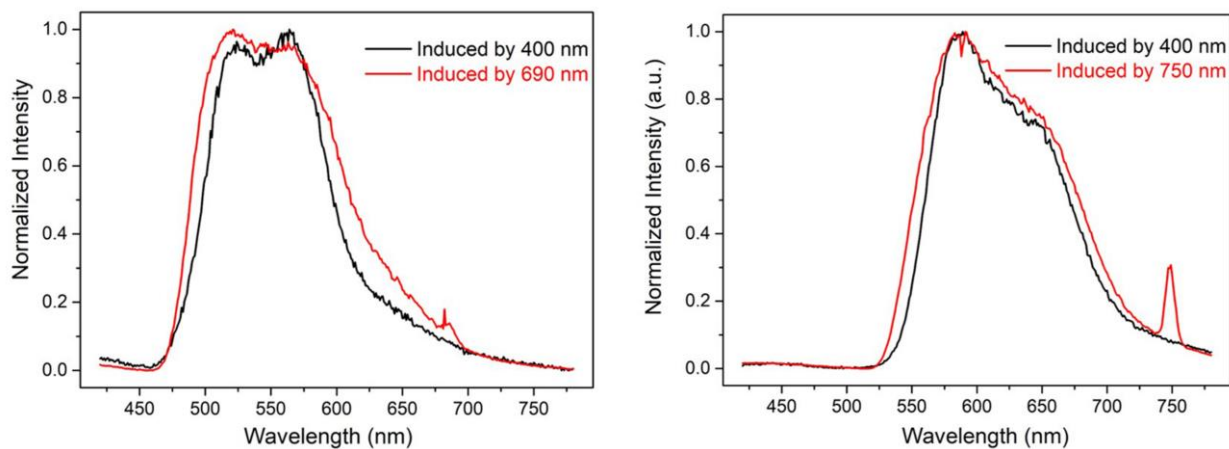

**Figure S16.** One-photon excited fluorescence and two-photon excited fluorescence (TPEF) spectra of the ligand (left) and the metallage (right).

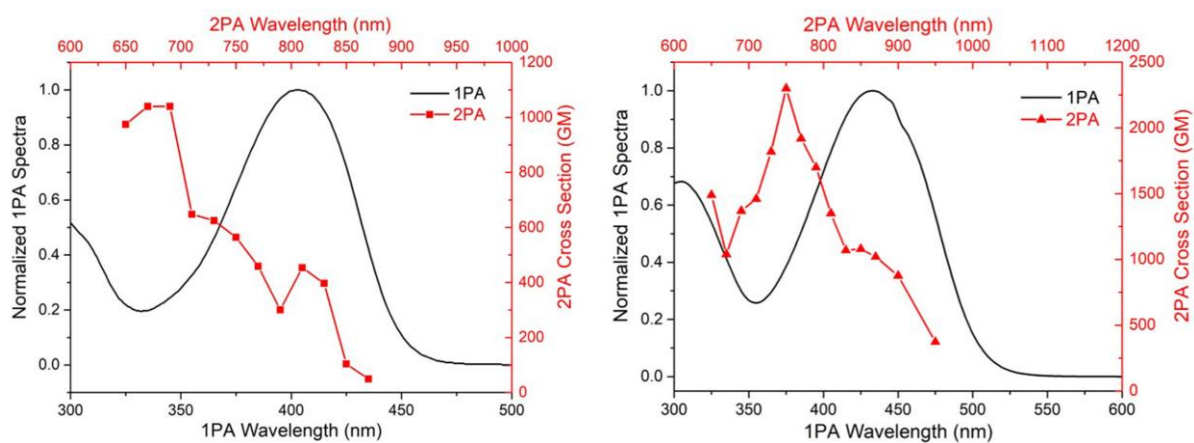

**Figure S17.** Combined 1PA and 2PA spectra of the ligand (left) and the metallage (right) in DMF. ( $c = 2 \times 10^{-3}$  M)

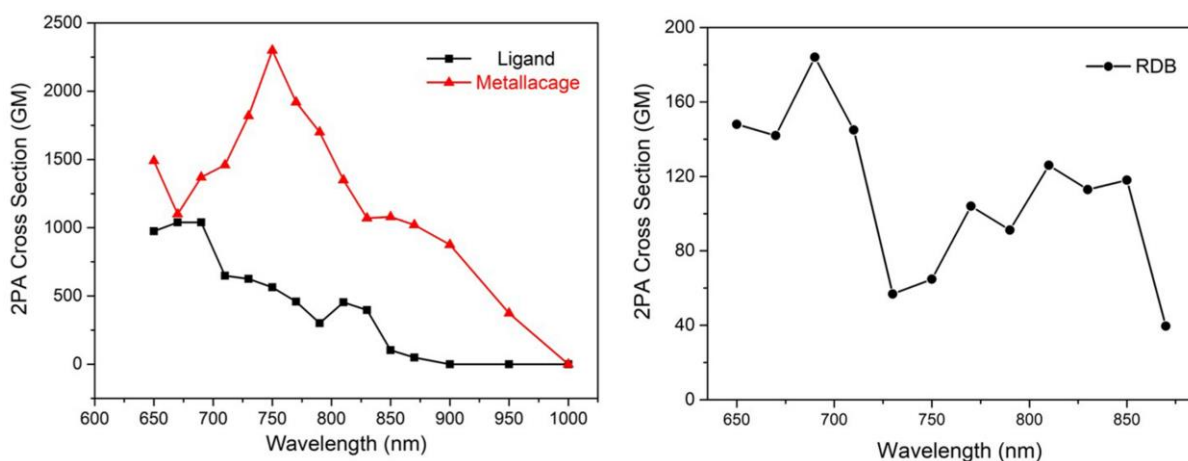

**Figure S18.** Two-photon absorption cross section ( $\delta_{2PA}$ ) of the ligand and the metallacage (left) ( $c = 2 \times 10^{-3}$  M) and the reference compound RDB ( $c = 1 \times 10^{-2}$  M) in DMF excited with different femtosecond wavelengths.

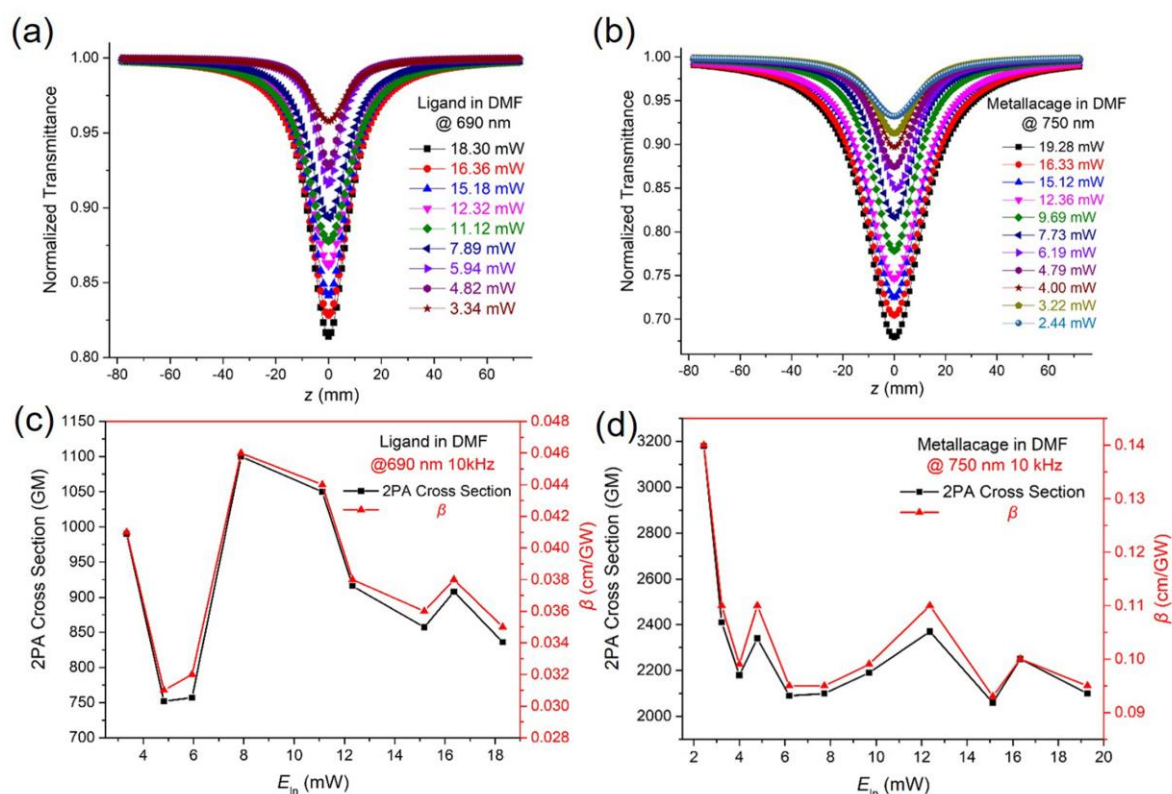

**Figure S19.** Normalized transmittance curves of the ligand (a) and the metallacage (b) in DMF excited at 690/750 nm on open aperture Z-scan style with increasing the exciting laser power.  $\delta_{2PA}$  values and the 2PA coefficient  $\beta$  of the ligand (c) and the metallacage (d) in DMF measured at 690/750 nm as a function of the input laser power at the focal plane. ( $c = 2 \times 10^{-3}$  M)

**Table S6.** Main nonlinear photophysical parameters of the ligand and the metallacage in DMF ( $c = 2.0 \times 10^{-3}$  M)

| Comp.       | $\lambda_{\text{abs}}/\text{nm}$ (1PA) | $\lambda_{\text{abs}}/\text{nm}$ (2PA) | $\beta/\text{cm}/\text{GW}$ | $\delta_{2\text{PA}}/\text{GM}$ | $n_2/\text{cm}^2/\text{GW}$ |
|-------------|----------------------------------------|----------------------------------------|-----------------------------|---------------------------------|-----------------------------|
| Ligand      | 403                                    | 690                                    | 0.043                       | 2300                            | $3.6 \times 10^{-6}$        |
| Metallacage | 433                                    | 750                                    | 0.10                        | 1040                            | $5.1 \times 10^{-7}$        |

## 7. NMR and MS characterization data

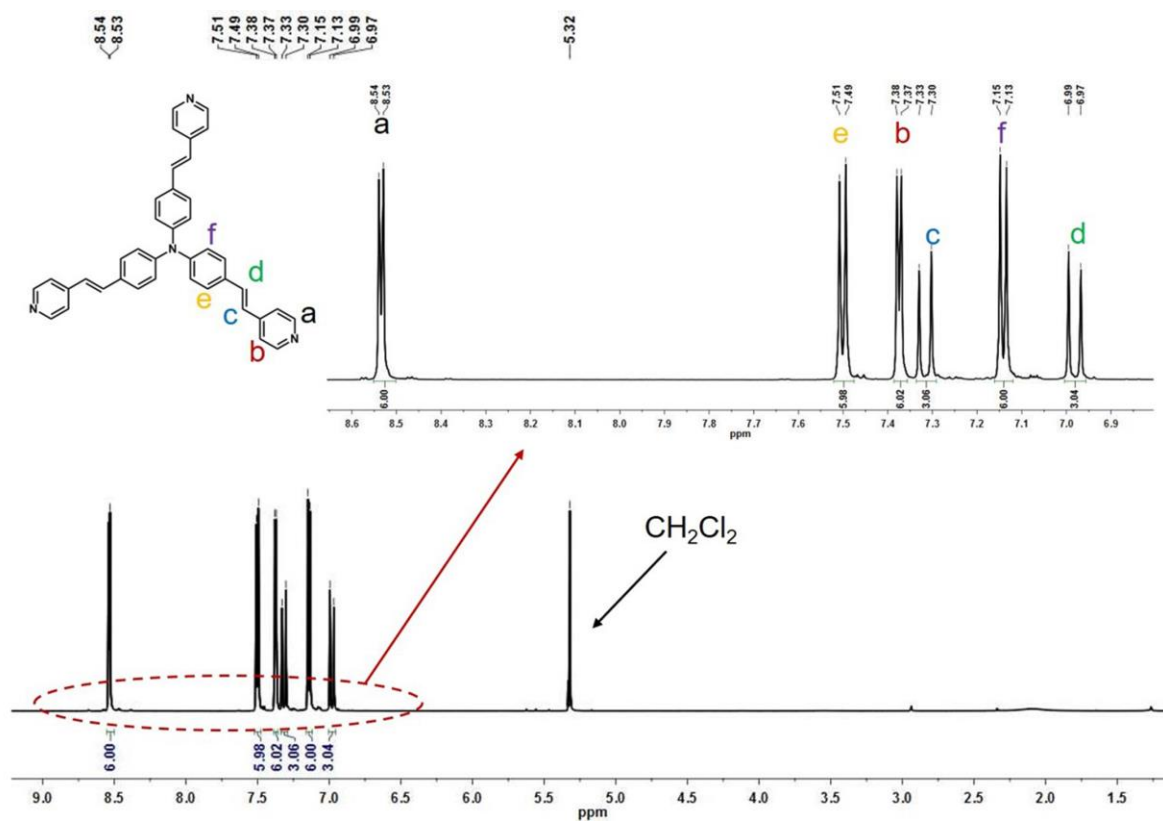

**Figure S20.**  $^1\text{H}$  NMR spectrum of the ligand. (600 MHz,  $\text{CD}_2\text{Cl}_2$ , 298 K)

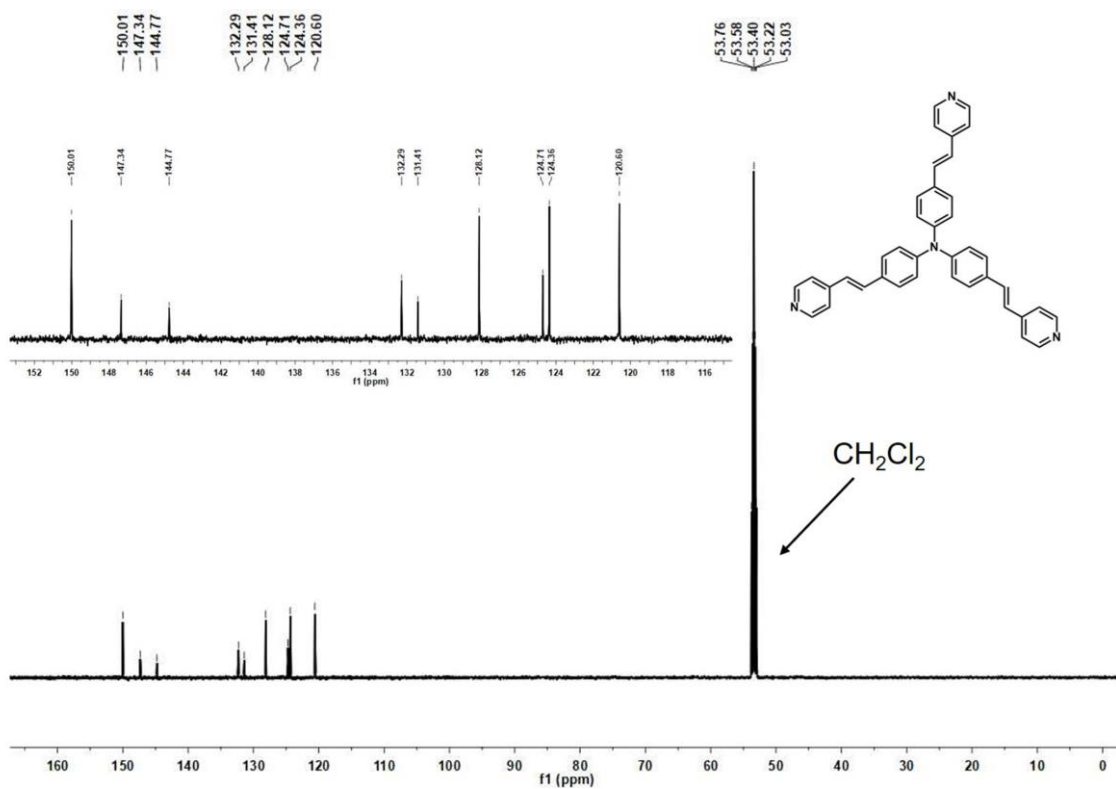

**Figure S21.**  $^{13}\text{C}$  NMR spectrum of the ligand. (151 MHz,  $\text{CD}_2\text{Cl}_2$ , 298 K)

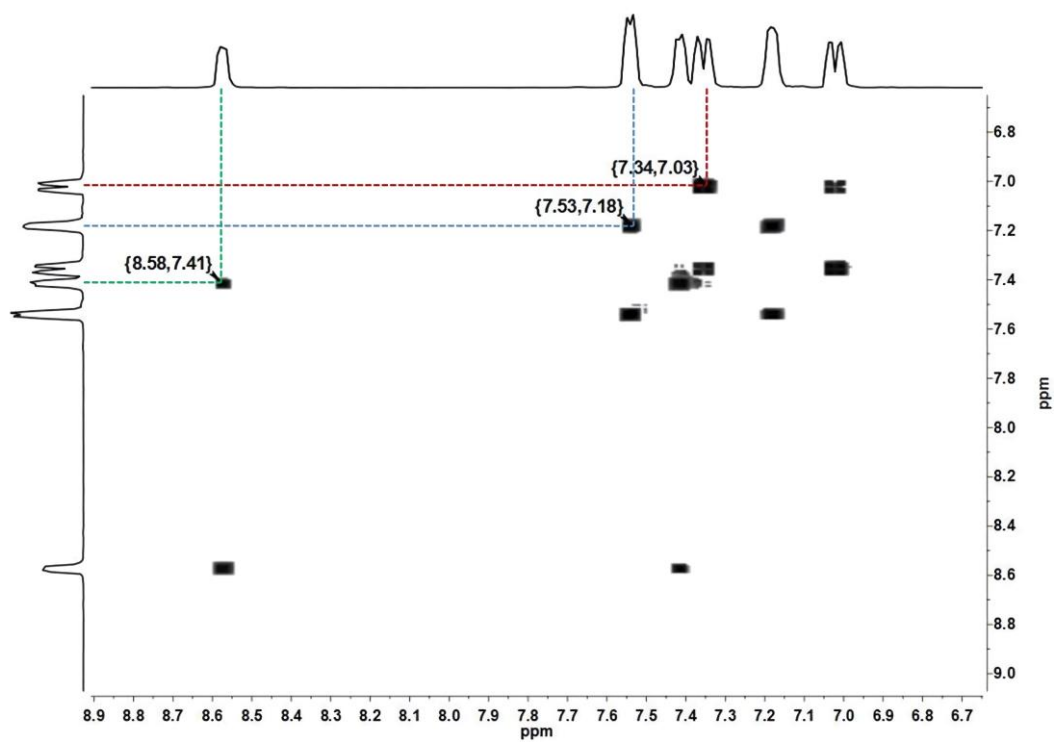

**Figure S22.** Partial  $^1\text{H}$ - $^1\text{H}$  COSY NMR spectrum of the ligand. (600 MHz,  $\text{CD}_2\text{Cl}_2$ , 298 K)

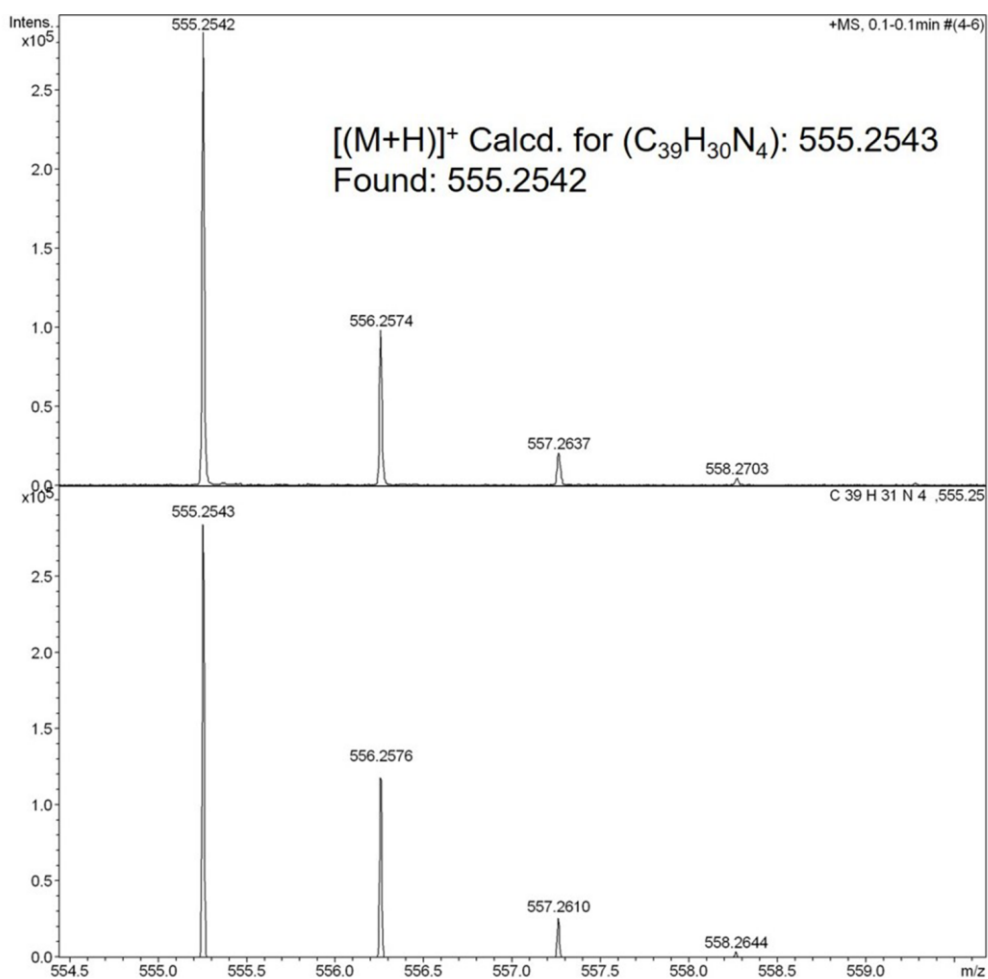

**Figure S23.** MS spectrum of the ligand. (Top, experimental data; Bottom, theoretical data)

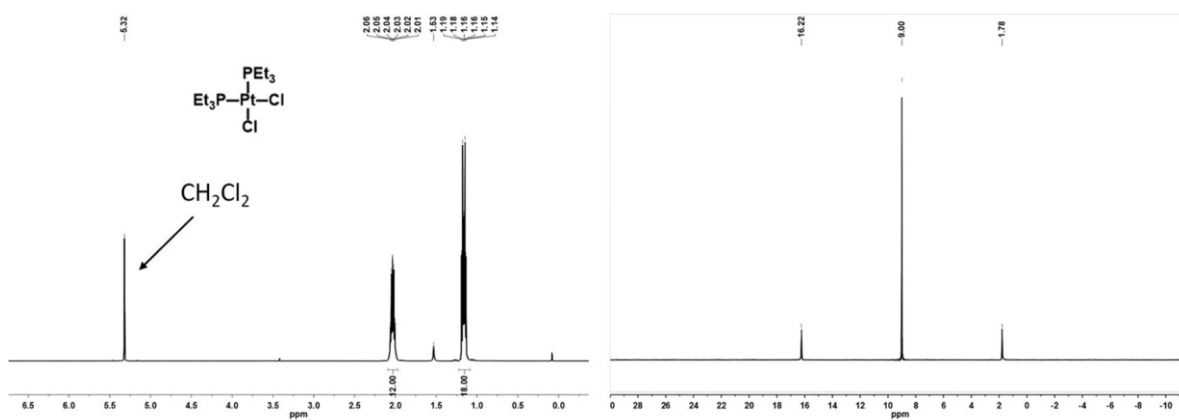

**Figure S24.**  $^1H$  NMR and  $^{31}P\{^1H\}$  NMR spectra of  $PtCl_2(PEt_3)_2$ . (600 MHz and 243 MHz,  $CD_2Cl_2$ , 298 K)

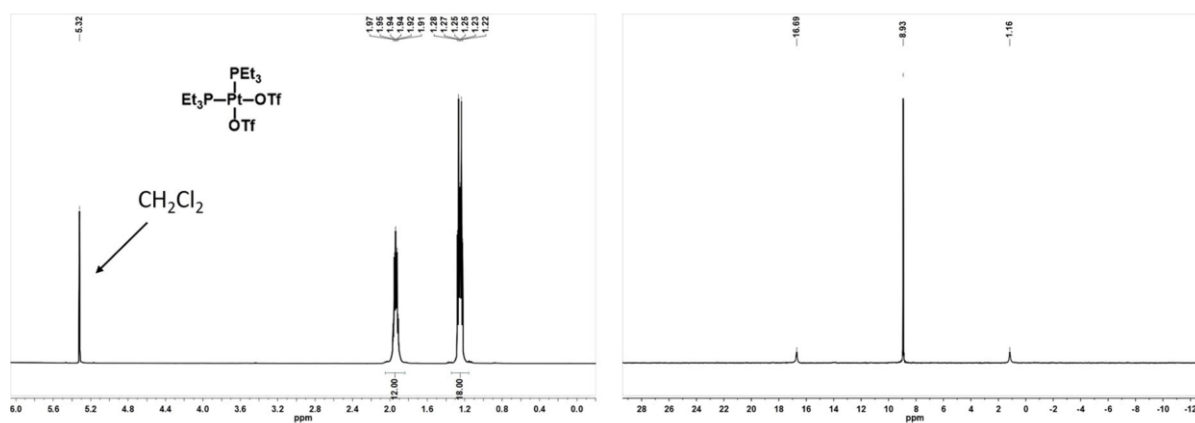

**Figure S25.**  $^1\text{H}$  NMR and  $^{31}\text{P}\{^1\text{H}\}$  NMR spectra of *cis*-( $\text{PEt}_3$ ) $_2\text{Pt}(\text{OTf})_2$ . (600 MHz and 243 MHz,  $\text{CD}_2\text{Cl}_2$ , 298 K)

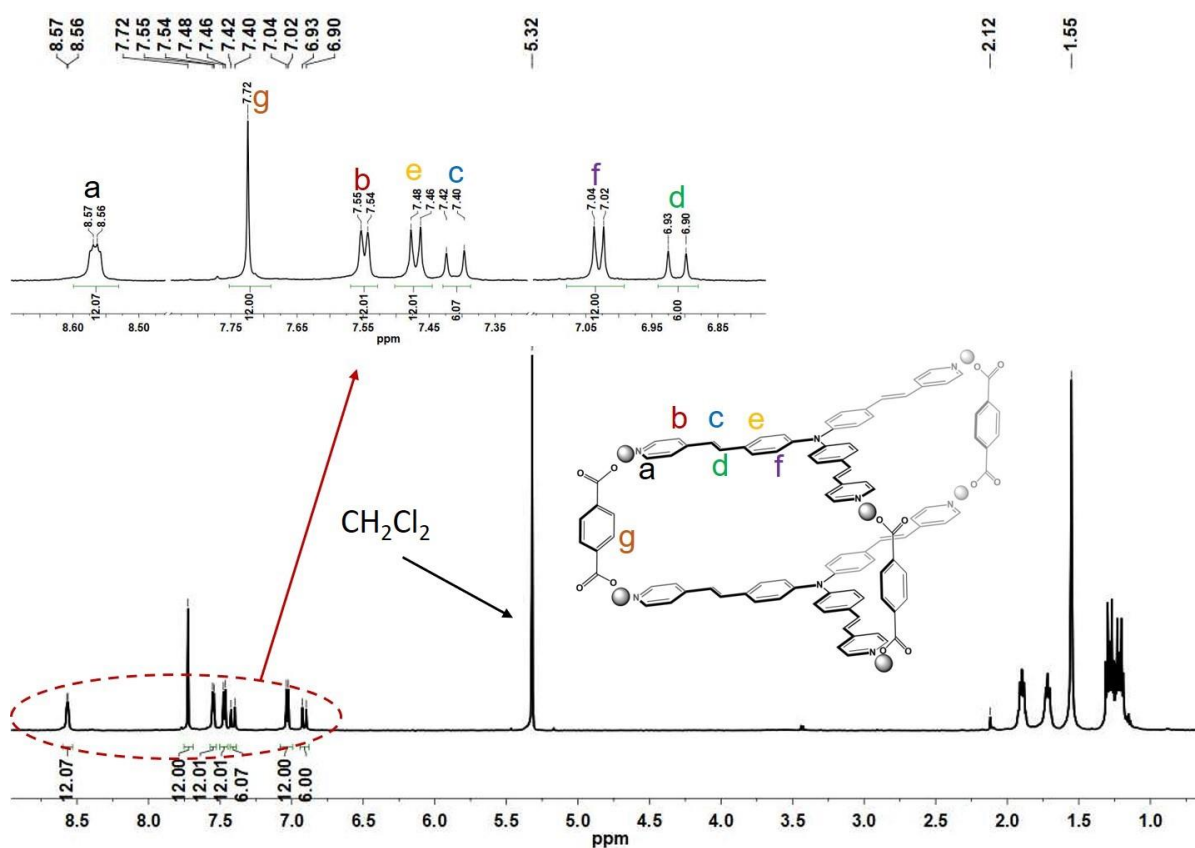

**Figure S26.**  $^1\text{H}$  NMR spectrum of the metallacage. (600 MHz,  $\text{CD}_2\text{Cl}_2$ , 298 K)

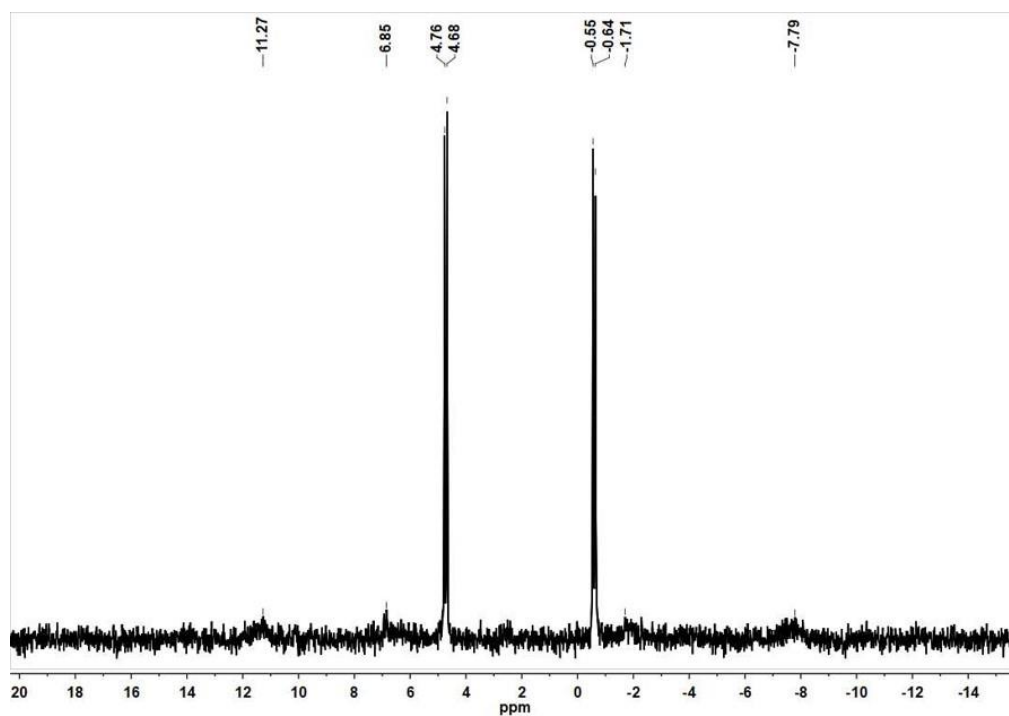

**Figure S27.**  $^{31}\text{P}\{^1\text{H}\}$  NMR spectrum of the metallage. (243 MHz,  $\text{CD}_2\text{Cl}_2$ , 298 K)

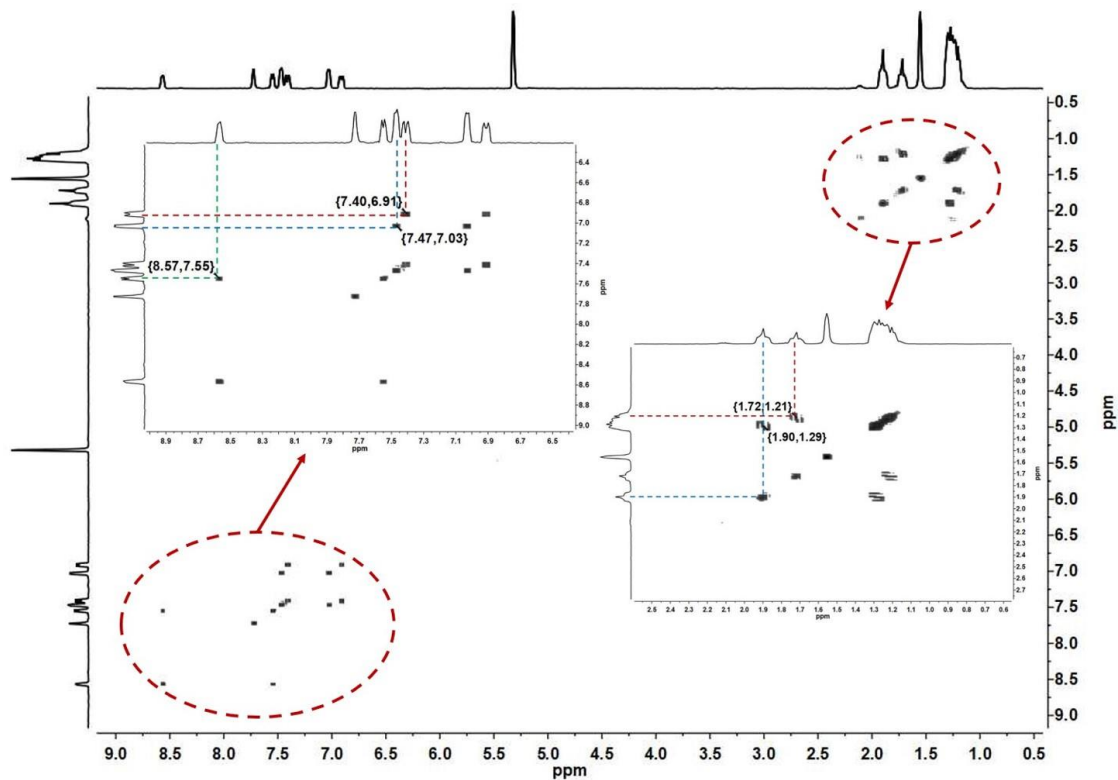

**Figure S28.**  $^1\text{H}$ - $^1\text{H}$  COSY NMR spectrum of the metallage. (600 MHz,  $\text{CD}_2\text{Cl}_2$ , 298 K)

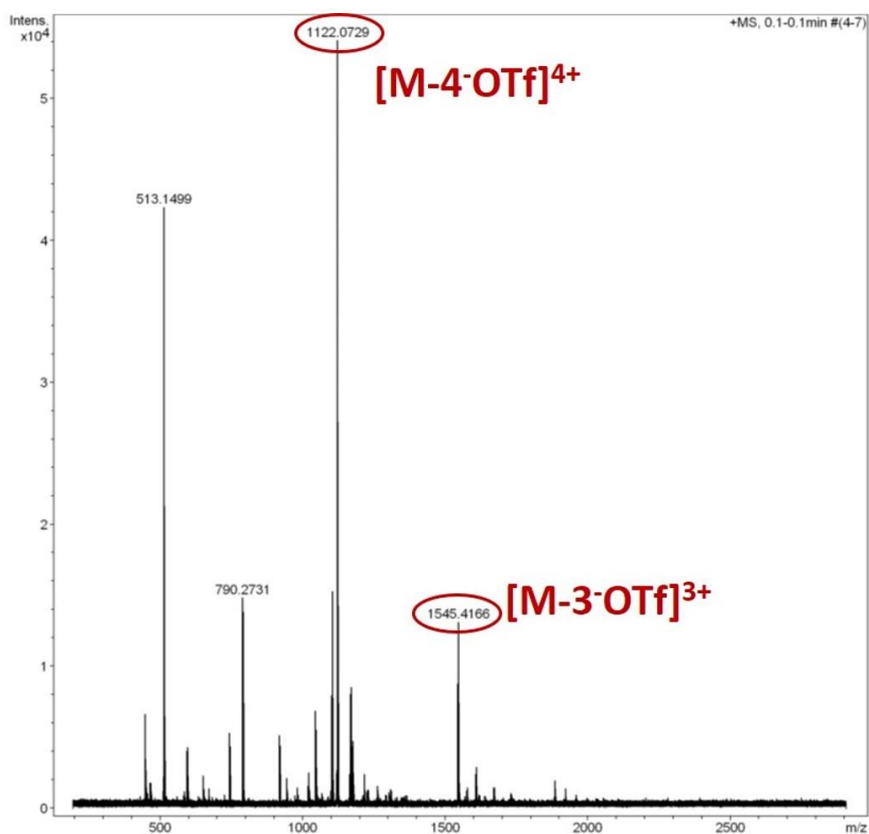

**Figure S29.** ESI-TOF-MS spectrum of the metallacage.

## References

- [1] Sheik-bahae, M.; Said, A. A.; Van Stryland, E. W. High-Sensitivity, Single-Beam  $n_2$  Measurements. *Opt. Lett.* **1989**, *14*, 955-957.
- [2] Sheik-bahae, M.; Said, A. A.; Wei, T.-H.; Hgan, D. J.; Van Stryland, E. W. *IEEE J. Quantum Electron.* **1990**, *26*, 760-769.
- [3] Makarov, N. S.; Drobizhev, M.; Rebane, A. Two-photon Absorption Standards in the 550-1600 nm Excitation Wavelength Range. *Opt. Express* **2008**, *16*, 4029-4047.
- [4] Ajami, A.; Husinsky, W.; Ovsianikov, A.; Liska, R. Dispersive White Light Continuum Single Z-scan for Rapid Determination of Degenerate Two-Photon Absorption Spectra. *Appl. Phys. B* **2018**, *124*, 142.



[5] Zang, J.; Feng, W.; Chang, X.; Liu, K.; Peng, H.; Ding, L.; Liu, T.; Fang, Y. Enhanced Two-Photon Absorption of Sandwich-Like Coordination Complexes Based on Squaraine and Metallomacrocyclic Derivatives. *Dyes Pigm.* **2021**, *193*, 109487.

[6] Feng, W.; Liu, K.; Zang, J.; Xu, J.; Peng, H.; Ding, L.; Liu, T.; Fang, Y. Resonance-Enhanced Two-Photon Absorption and Optical Power Limiting Properties of Three-Dimensional Perylene Bisimide Derivatives. *J. Phys. Chem. B* **2021**, *125* (41), 11540-11547.
